# Supplementary material for: HIV-1 molecular diversity in Brazil unveiled by 10 years of sampling by the national genotyping network
Source: Springer Nature journal article supplement (doi:10.1038/s41598-021-94542-5), 2021-08-04
Supplement: MOESM1 [file 41598_2021_94542_MOESM1_ESM.pdf]

## Supplementary Material:

# HIV-1 molecular diversity in Brazil unveiled by 10 years of sampling by the national genotyping network

Tiago Gräf<sup>1\*</sup>; Gonzalo Bello<sup>2</sup>; Paula Andrade<sup>2</sup>; Ighor Arantes<sup>2</sup>; João Pereira<sup>3,4</sup>; Alexandre Bonfim Pinheiro da Silva<sup>3,4</sup>; Rafael V. Veiga<sup>5,6</sup>; Diana Mariani<sup>3</sup>; Lídia Theodoro Boullosa<sup>3</sup>; Mônica B. Arruda<sup>3</sup>; José Carlos Couto Fernandez<sup>2</sup>; Ann M. Dennis<sup>7</sup>; David A. Rasmussen<sup>8,9</sup>; Amilcar Tanuri<sup>3</sup>.

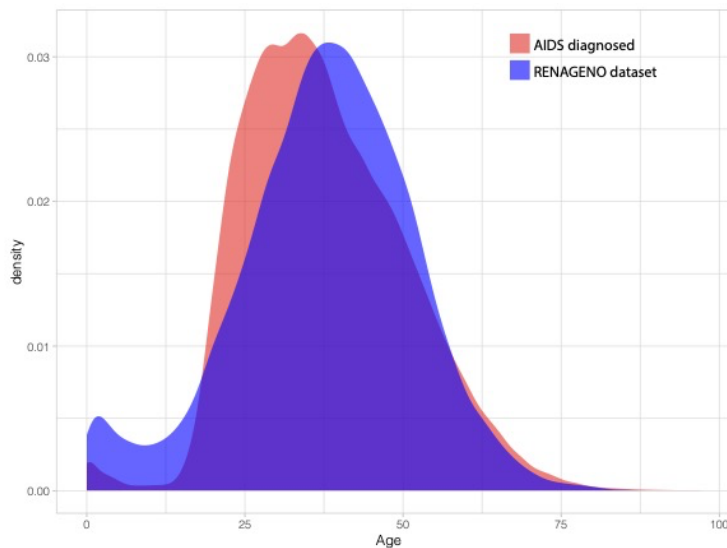

**Supplementary figure 1.** Age density distribution of all individuals diagnosed with AIDS in Brazil (red) between 2015-2017 and in the RENAGENO dataset (blue) in the same period.

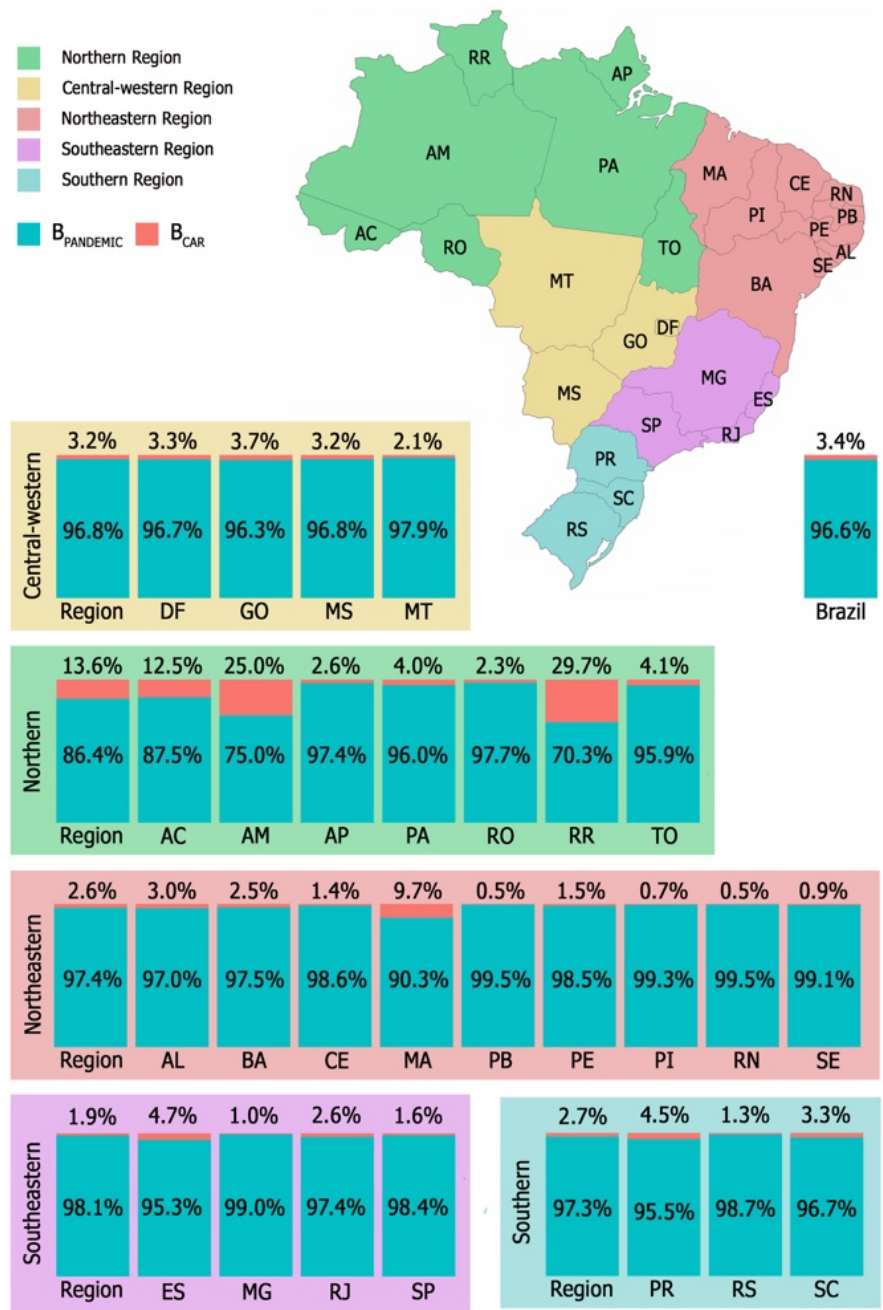

**Supplementary figure 2.** Proportion of the HIV-1B pandemic ( $B_{\text{PANDEMIC}}$ ) and Caribbean ( $B_{\text{CAR}}$ ) lineages per Brazilian states and regions. Plots and maps were drawn in R (version 4.0.3 - <https://www.r-project.org>) using the libraries ggplot2, tmap, sf and brazilmaps.

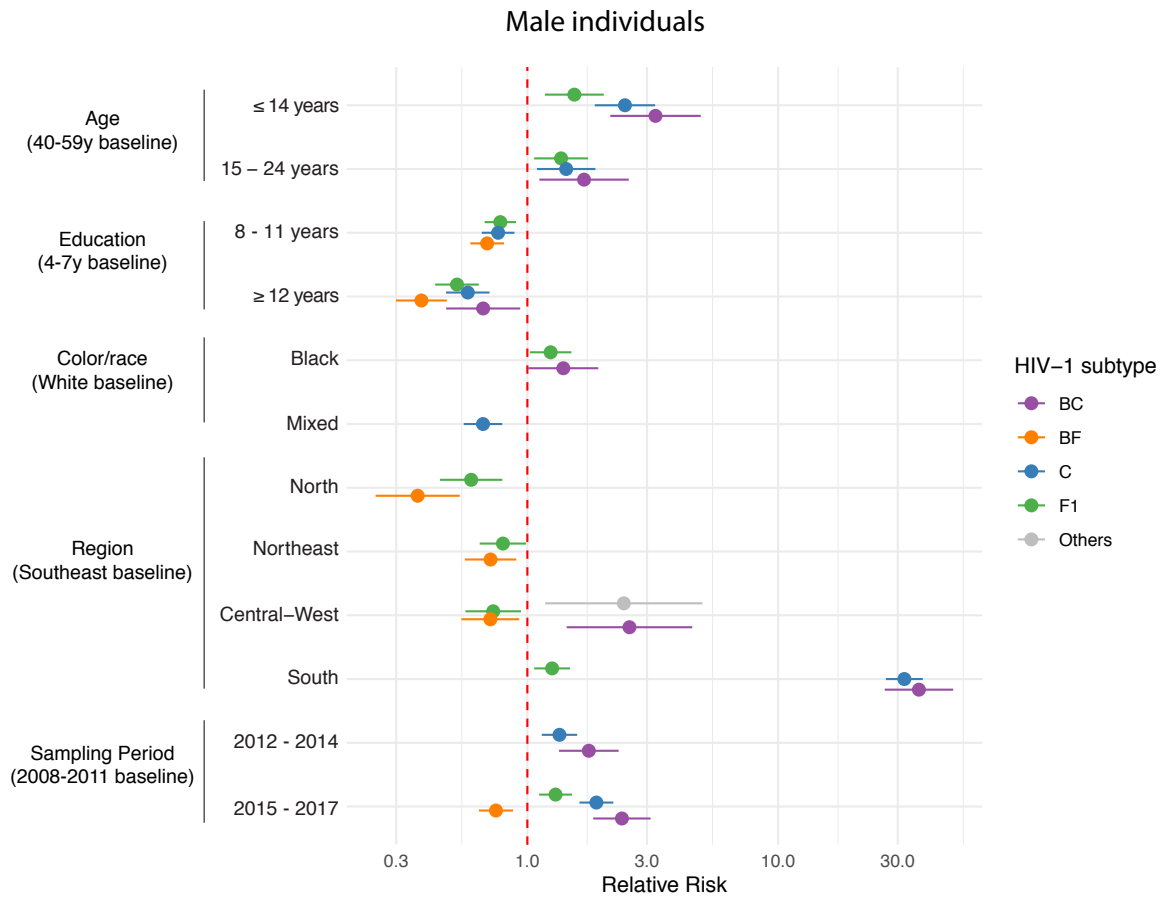

**Supplementary figure 3.** Relative risk of HIV-1 subtypes and main recombinant forms among RENAGENO male sampled population.

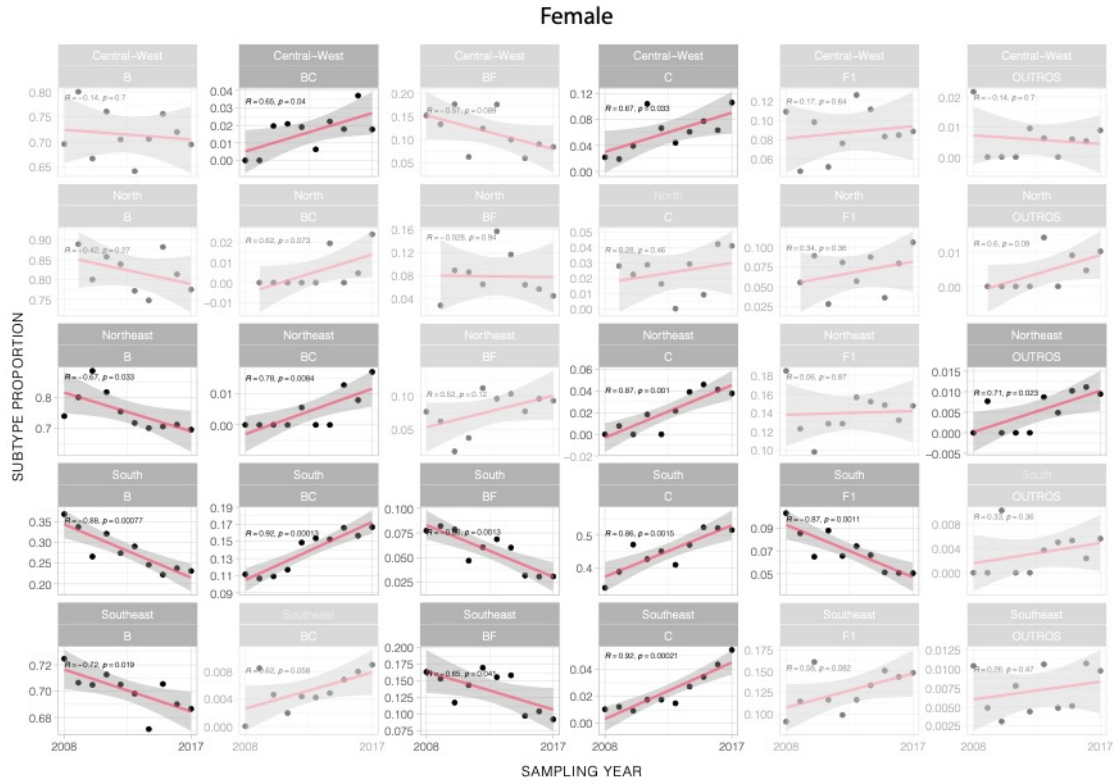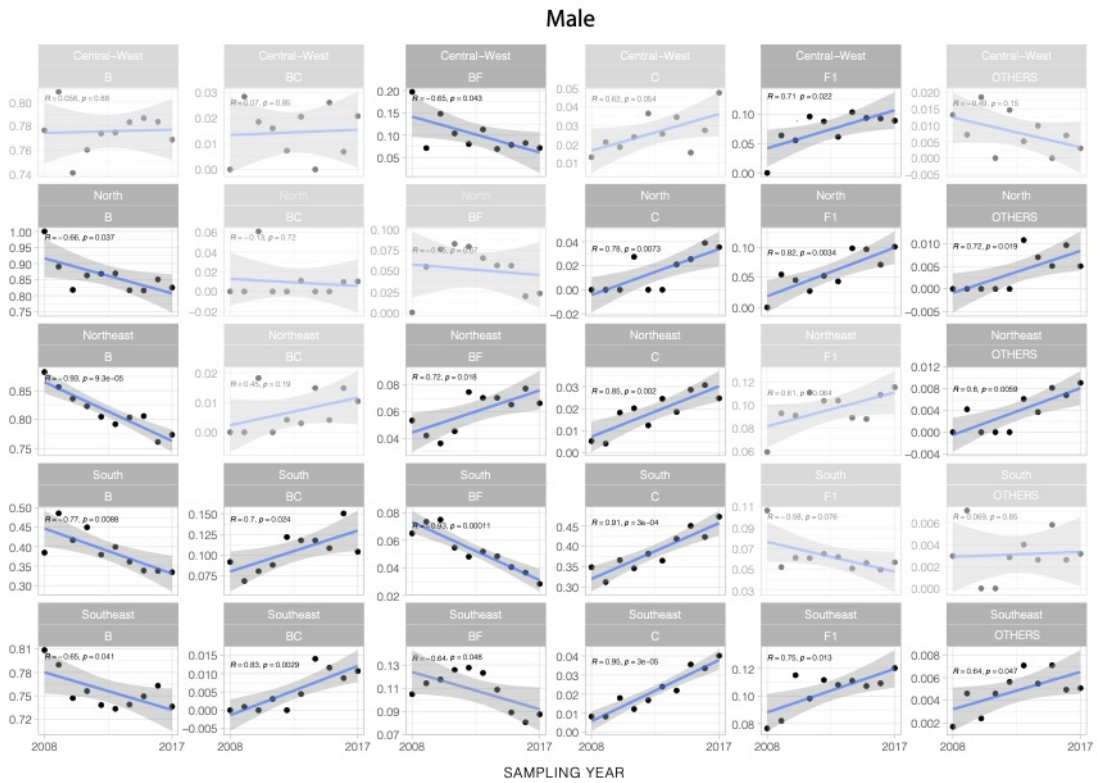

**Supplementary figure 4.** Pearson correlation between HIV-1 variant proportion and sampling year. Panels are organized by viral variant (columns) and country region (rows). Significant correlations are highlighted and coefficients and  $p$  values are shown.

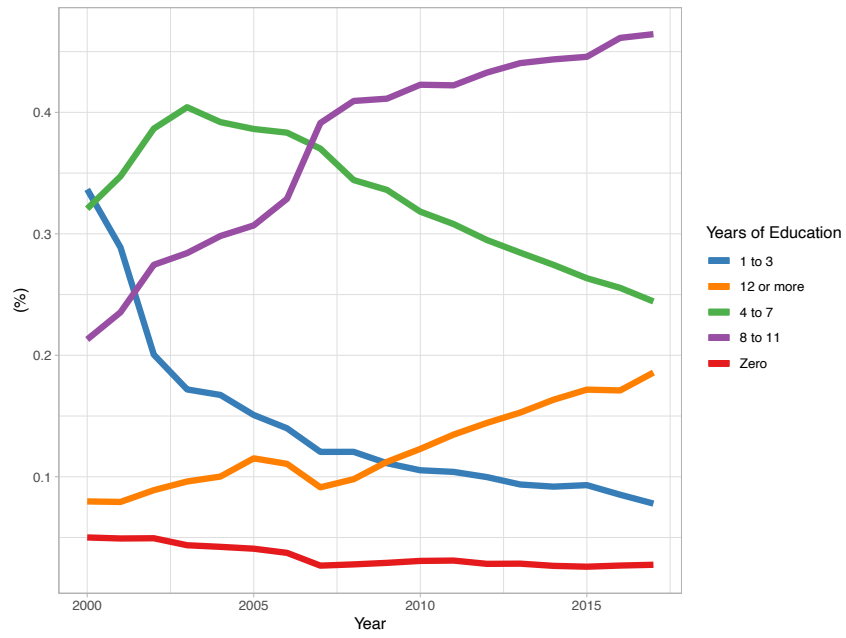

**Supplementary figure 5.** New AIDS diagnosed individuals in Brazil per education status.
